# Supplementary material for: E3 Ubiquitin Ligase HRD1 Promotes Lung Tumorigenesis by Promoting Sirtuin 2 Ubiquitination and Degradation
Source: PubMed Central journal article supplement (PMC7076256; doi:10.1128/mcb.00257-19), 2020-03-16
Supplement: MCB.00257-19-s0002.pdf [file MCB.00257-19-s0002.pdf]

Figure S1

A

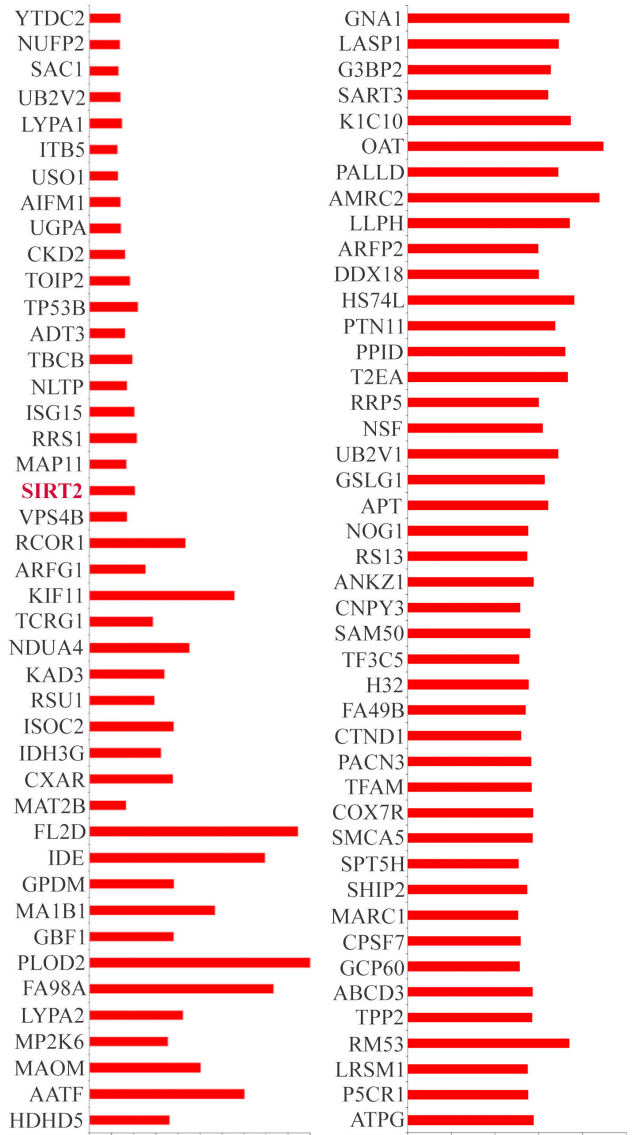

■ (HRD1KO/Control) > 1.5 fold, up regulated

B

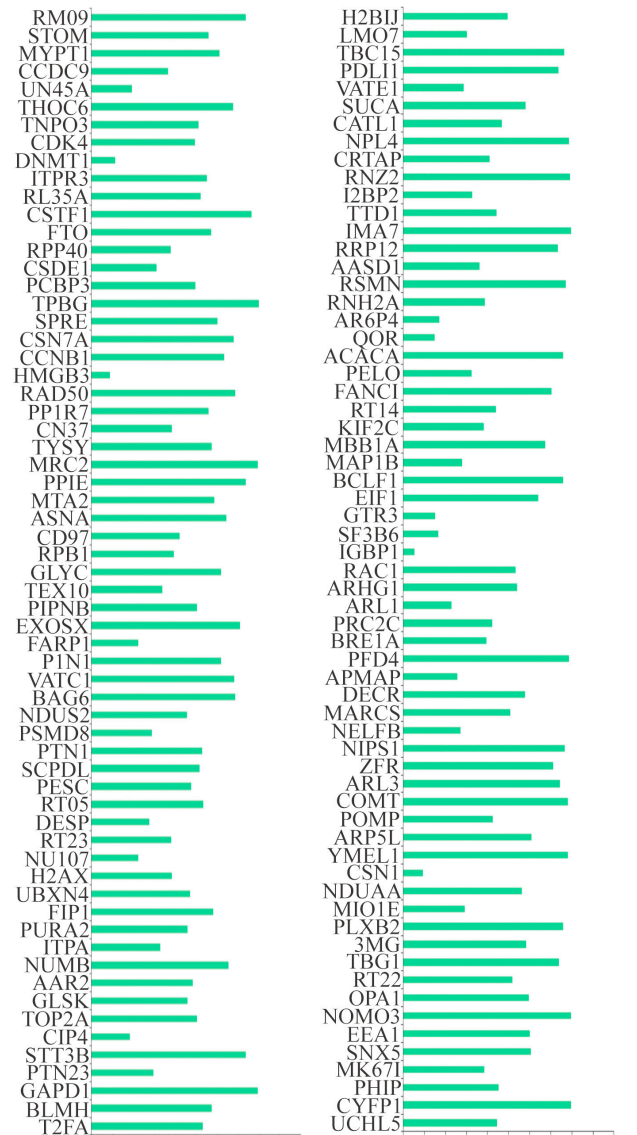

■ (Control/HRD1KO) > 1.5 fold, down regulated
