# Supplementary material for: E3 Ubiquitin Ligase HRD1 Promotes Lung Tumorigenesis by Promoting Sirtuin 2 Ubiquitination and Degradation
Source: PubMed Central journal article supplement (PMC7076256; doi:10.1128/mcb.00257-19), 2020-03-16

Figure S2

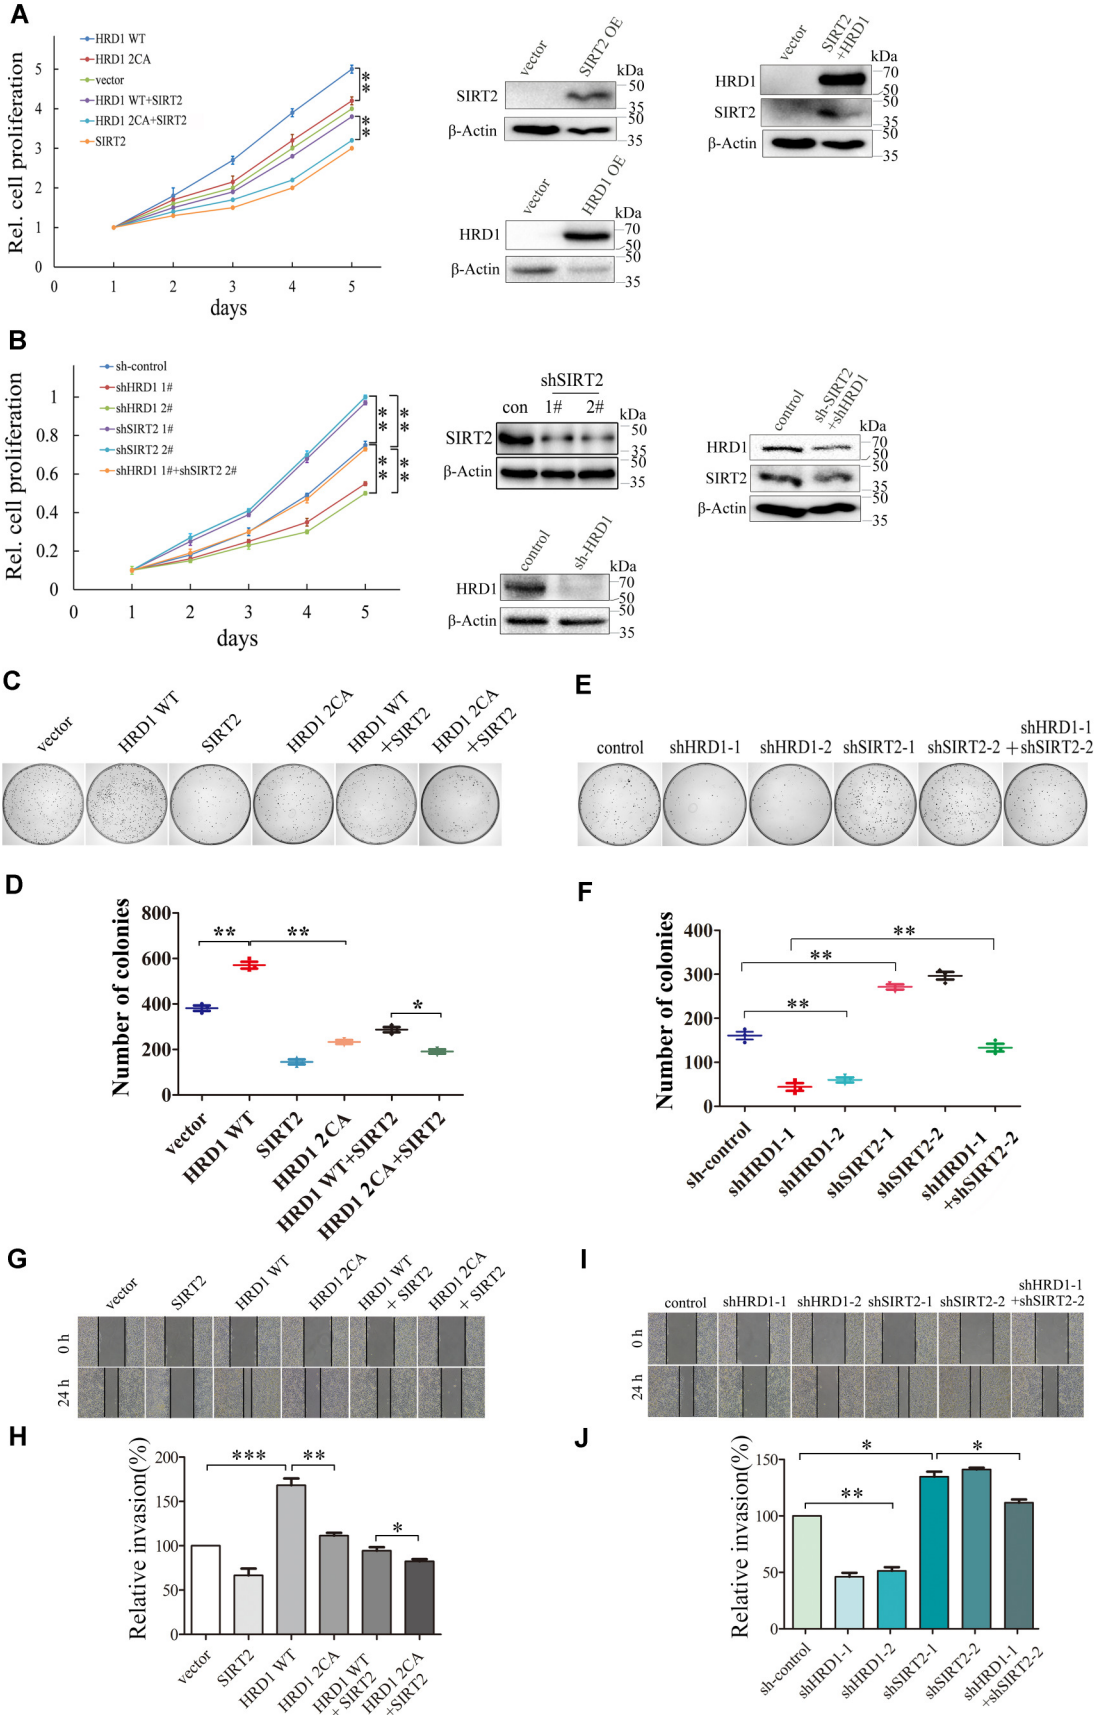

Supplement: MCB.00257-19-s0003.pdf [file MCB.00257-19-s0003.pdf]
